# Supplementary material for: Facile scalable synthesis and superior lithium storage performance of ball-milled MoS2–graphite nanocomposites
Source: Royal Society of Chemistry journal article supplement (doi:10.1039/c5ta00472a), 2015-01-01
Supplement: c5ta00472a1.pdf [file c5ta00472a1.pdf]

## Electronic Supplementary Information (ESI)

### **Facile scalable synthesis and superior lithium storage performance of ball-milled MoS<sub>2</sub>-graphite nanocomposites**

**Haihua Zhao,<sup>a,b</sup> Hong Zeng,<sup>\*c</sup> Ying Wu,<sup>c</sup> Shengen Zhang,<sup>b</sup> Bo Li,<sup>a</sup> and Yunhui Huang<sup>d</sup>**

<sup>a</sup> *Central Iron and Steel Research Institute, 76 South Xueyuanlu Rd, Haidan District, Beijing 100081, China*

<sup>b</sup> *Institute for Advanced Materials Technology and School of Materials Science and Engineering, University of Science and Technology Beijing, Beijing, 100083, China*

<sup>c</sup> *Beijing Key Laboratory of Energy Nanomaterials, Advance Technology & Materials Co., Ltd, China Iron & steel Research Institute Group, Beijing 100081, P.R. China*

<sup>d</sup> *State Key Laboratory of Material Processing and Die & Mould Technology, School of Materials Science and Engineering, Huazhong University of Science and Technology, Wuhan, Hubei 430074, China*

*E-mail: zenghong78@live.cn*

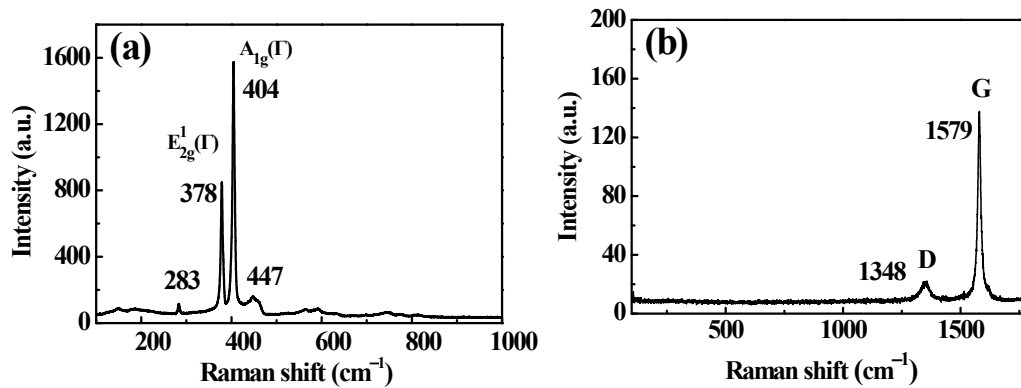

Fig. S1 Raman spectra of (a) raw MoS<sub>2</sub> and (b) raw graphite.

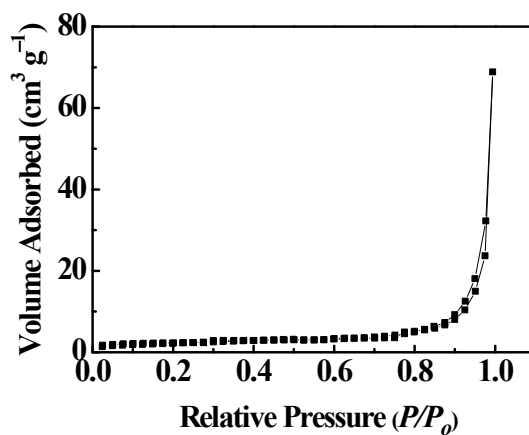

Fig. S2 Nitrogen adsorption and desorption isotherms of the MoS<sub>2</sub>-C nanocomposite (30% C).

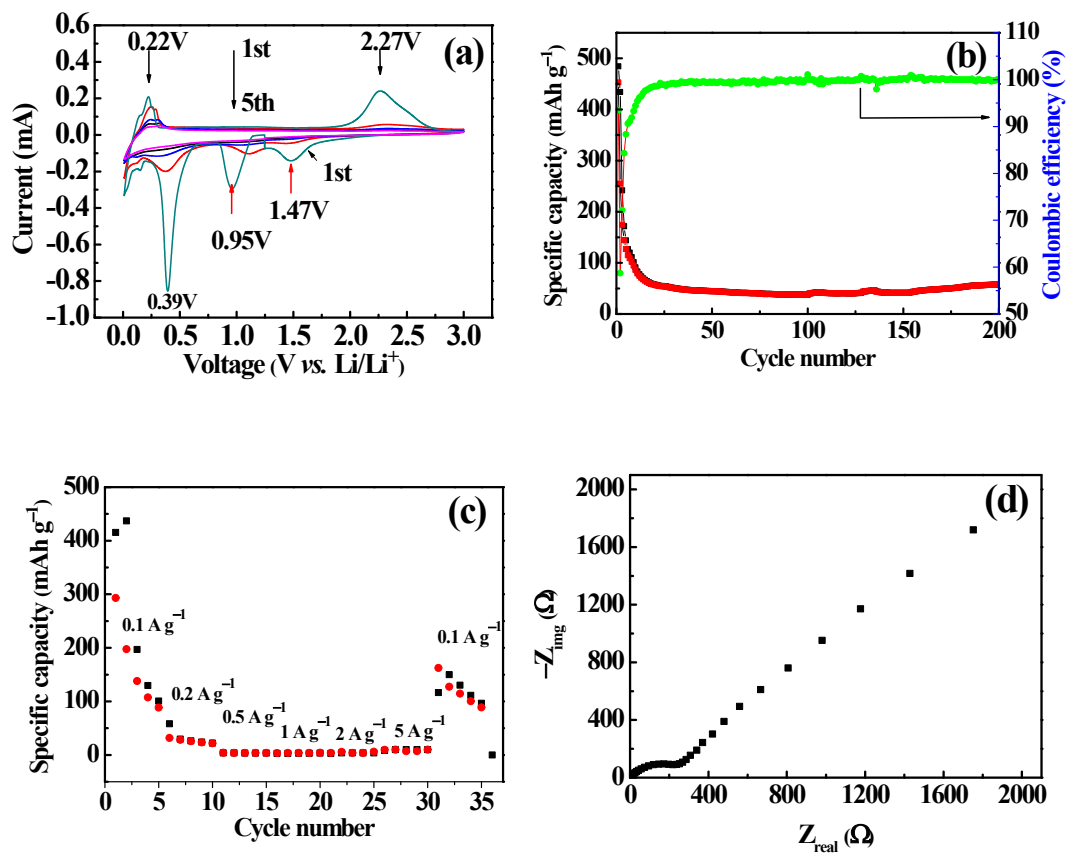

Fig. S3 Electrochemical performances of the raw MoS<sub>2</sub> material: (a) cyclic voltammetry curves, (b) cycling performance, (c) rate performance, and (d) electrochemical impedance spectrum.

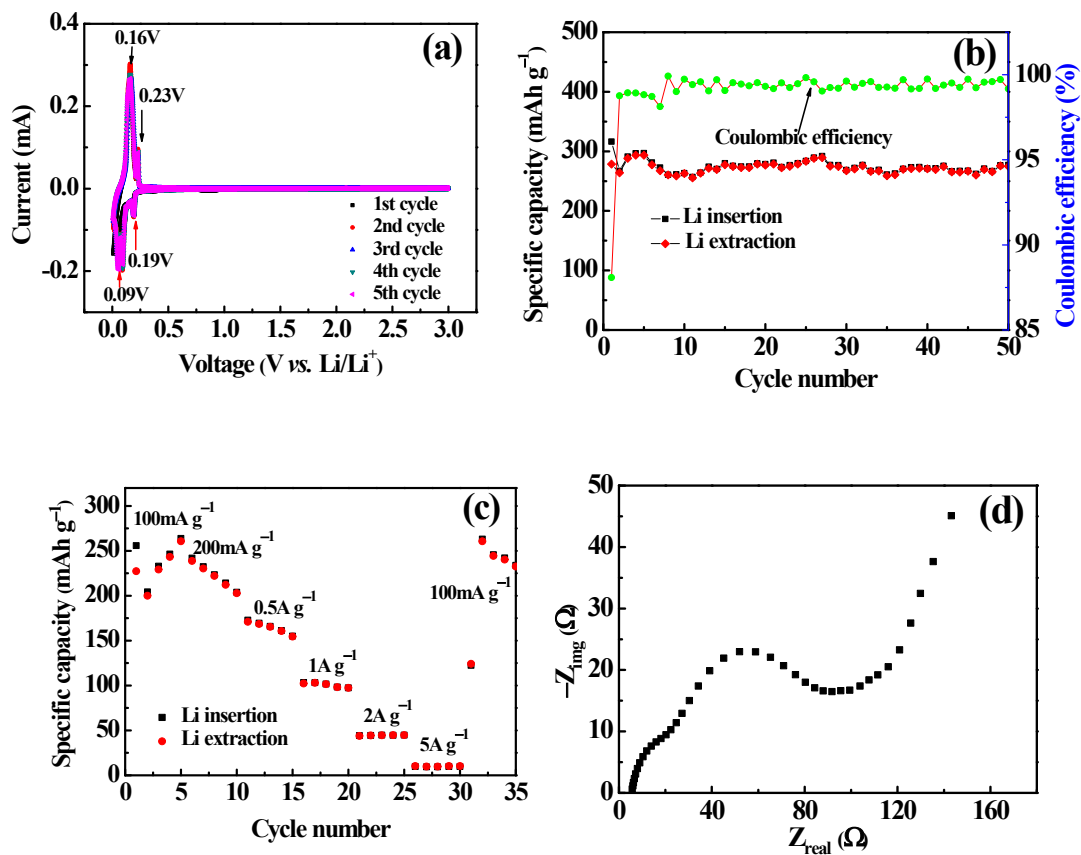

Fig. S4 Electrochemical performances of the raw graphite: (a) cyclic voltammetry curves, (b) cycling performance, (c) rate performance, and (d) electrochemical impedance spectrum.

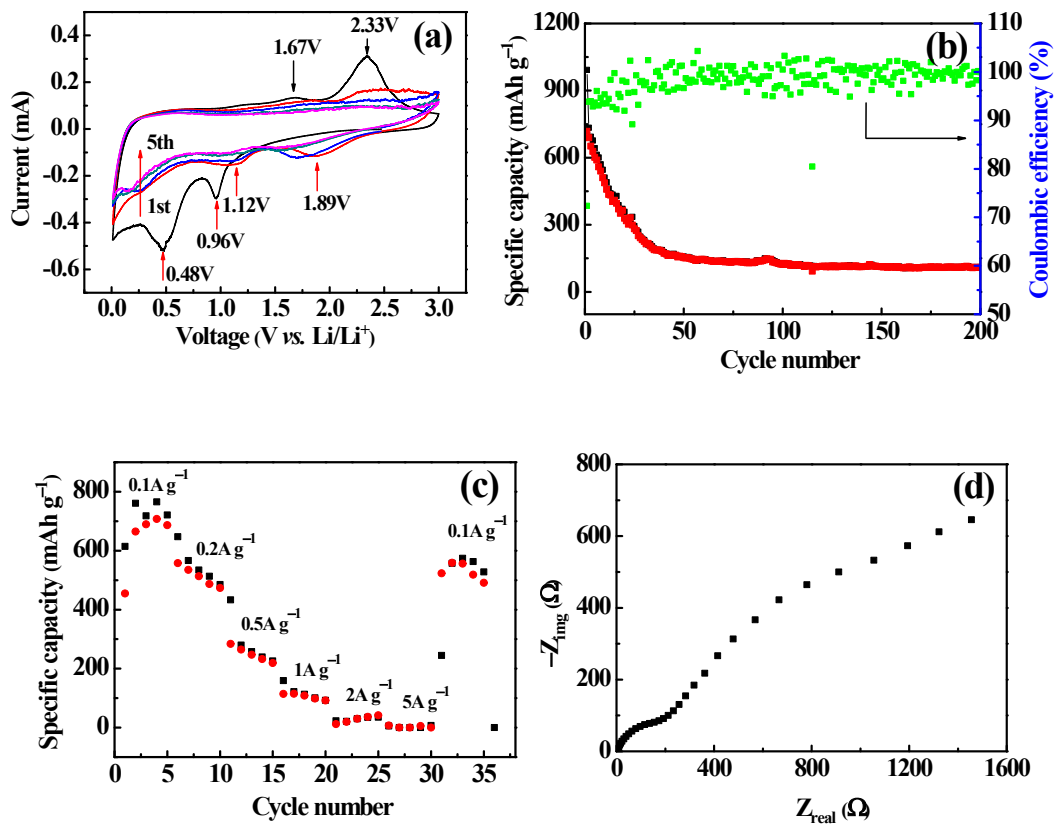

**Fig. S5** Electrochemical performances of ball-milled  $\text{MoS}_2$ : (a) cyclic voltammetry curves, (b) cycling performance, (c) rate performance, and (d) electrochemical impedance spectrum.

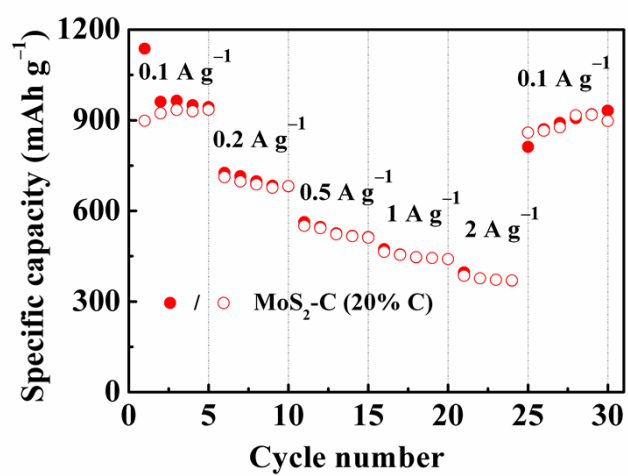

Fig. S6 Rate performance of ball-milled MoS<sub>2</sub>-C (20% C) nanocomposite.

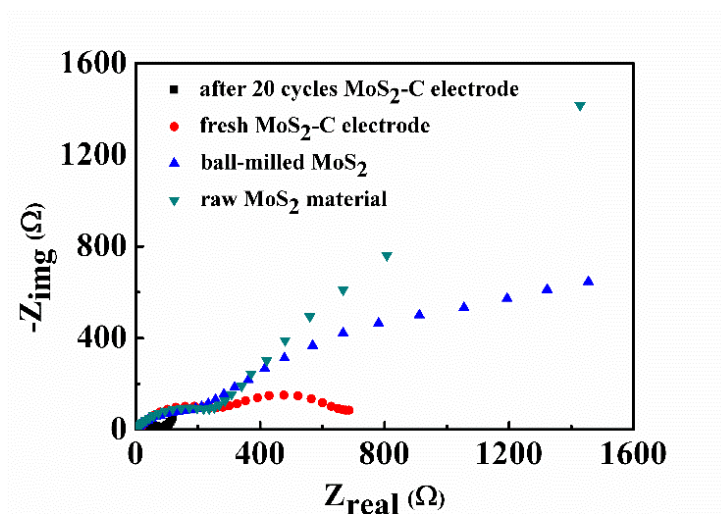

Fig. S7 The electrochemical impedance spectra of the MoS<sub>2</sub> materials.

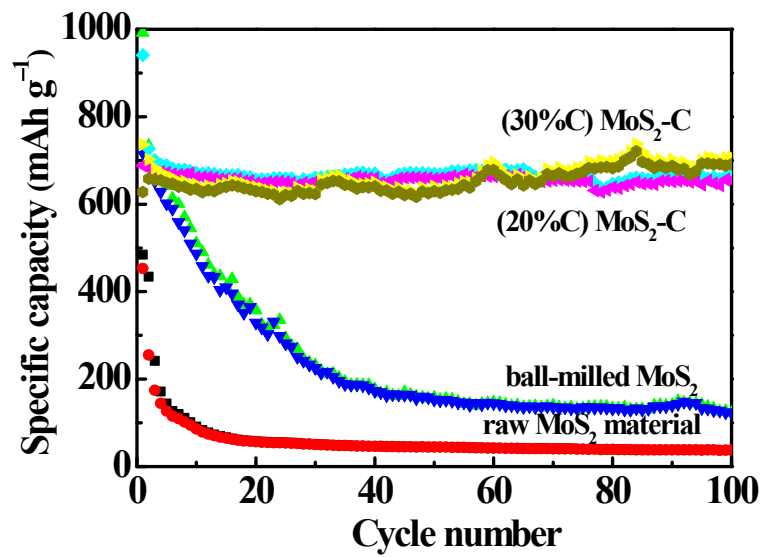

Fig. S8 The cycling performances of the MoS<sub>2</sub> materials.
